# Supplementary material
Source: PubMed Central journal article supplement (PMC3507491)
Supplement: cc-11-3956-s01.pdf [file cc-11-3956-s01.pdf]

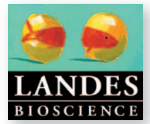

## **Supplemental Material to:**

**Ubaldo E. Martinez-Outschoorn, Zhao Lin,  
Diana Whitaker-Menezes, Anthony Howell,  
Michael P. Lisanti and Federica Sotgia**

**Ketone bodies and two-compartment tumor metabolism:  
Stromal ketone production fuels mitochondrial biogenesis  
in epithelial cancer cells**

**2012; 11(21)**

**<http://dx.doi.org/10.4161/cc.22136>**

**<http://www.landesbioscience.com/journals/cc/article/22136>**

**Supplemental Table 1. Proteomic Analysis of MCF7 Cells After L-lactate Treatment**

|                                                                                                     | <u>Fold change</u><br>(Lactate/Control) | <u>Accession Number</u> | <u>Protein Spot Number</u> | <u>Localization</u> |
|-----------------------------------------------------------------------------------------------------|-----------------------------------------|-------------------------|----------------------------|---------------------|
| <b>Heat Shock Proteins and Nuclear Chaperonins</b>                                                  |                                         |                         |                            |                     |
| nucleophosmin (nucleolar phosphoprotein B23, numatrin) (NPM1)                                       | 1.66                                    | gi 18314408             | 4                          | Nucleus             |
| calreticulin (CALR)                                                                                 | 1.61                                    | gi 62897681             | 1                          | ER                  |
| calreticulin (CALR)                                                                                 | 1.6                                     | gi 62897681             | 2                          | ER                  |
| <b>Mitochondrial Metabolism and Fatty Acids Oxidation</b>                                           |                                         |                         |                            |                     |
| ATP synthase, H+ transporting,<br>mitochondrial F1 complex, delta subunit (ATP5D)                   | 3.07                                    | gi 4502297              | 17                         | <b>Mito</b>         |
| complement component 1,<br>q subcomponent binding protein (C1QBP)                                   | 1.5                                     | gi 4930073              | 6                          | <b>Mito</b>         |
| hydroxysteroid (17-beta) dehydrogenase 10 (HSD17B10)                                                | 1.4                                     | gi 4758504              | 9                          | <b>Mito</b>         |
| <b>RNA Splicing and Protein Synthesis</b>                                                           |                                         |                         |                            |                     |
| ribosomal protein, large P2 (RPLP2)                                                                 | 1.91                                    | gi 4506671              | 15                         | Cytoplasm           |
| U2 small nuclear RNA auxiliary factor 1 (U2AF1)                                                     | 1.37                                    | gi 5803207              | 5                          | Nucleus             |
| <b>Cell Cycle Regulation</b>                                                                        |                                         |                         |                            |                     |
| tyrosine 3-monooxygenase/tryptophan<br>5-monooxygenase activation protein, zeta polypeptide (YWHAZ) | 2.73                                    | gi 83754467             | 7                          | Nucleus             |
| cell division cycle 42 (GTP binding protein, 25kDa) (CDC42)                                         | 1.48                                    | gi 5542168              | 10                         | Membrane            |
| RAN, member RAS oncogene family (RAN)                                                               | 1.43                                    | gi 48734884             | 8                          | Nucleus             |
| <b>Keratins</b>                                                                                     |                                         |                         |                            |                     |
| keratin 19 (KRT19)                                                                                  | 1.67                                    | gi 7594732              | 3                          | Cytoplasm           |
| keratin 10 (KRT10)                                                                                  | 1.5                                     | gi 195972866            | 6                          | Cytoplasm           |
| <b>Others</b>                                                                                       |                                         |                         |                            |                     |
| ubiquitin B (UBB)                                                                                   | 1.5                                     | gi 119624911            | 11                         | Cytoplasm           |
| chromosome 21 open reading frame 33 (C21orf33)                                                      | 1.43                                    | gi 134142815            | 8                          | <b>Mito</b>         |

**Supplemental Table 2. Proteomic Analysis of MCF7 Cells After 3-Hydroxy-Butyrate Treatment**

|                                                                            | Fold change<br>(Butyrate/Control) | Accession Number | Protein Spot Number | Localization |
|----------------------------------------------------------------------------|-----------------------------------|------------------|---------------------|--------------|
| <b>Heat Shock Proteins</b>                                                 |                                   |                  |                     |              |
| DnaJ (Hsp40) homolog, subfamily C, member 7 (DNAJC7)                       | 2.41                              | gi 119581193     | 23                  | Cytoplasm    |
| heat shock 60kDa protein 1 (chaperonin) (HSPD1)                            | 1.85                              | gi 77702086      | 12                  | <b>Mito</b>  |
| heat shock 60kDa protein 1 (chaperonin) (HSPD1)                            | 1.47                              | gi 31542947      | 13                  | <b>Mito</b>  |
| heat shock 70kDa protein 9 (mortalin) (HSPA9)                              | 1.28                              | gi 21040386      | 5                   | <b>Mito</b>  |
| heat shock 70kDa protein 5<br>(glucose-regulated protein, 78kDa) (HSPA5)   | 1.58                              | gi 16507237      | 3                   | ER           |
| calreticulin (CALR)                                                        | 1.44                              | gi 62897681      | 14                  | ER           |
| calumenin (CALU)                                                           | 1.41                              | gi 2809324       | 15                  | ER           |
| protein disulfide isomerase family A, member 3 (PDIA3)                     | 1.29                              | gi 220702506     | 16                  | ER           |
| endoplasmic reticulum protein 29 (ERP29)                                   | 1.25                              | gi 192987144     | 35                  | ER           |
| <b>Pentose Phosphate Pathway/ Glutathione Metabolism</b>                   |                                   |                  |                     |              |
| glucose-6-phosphate dehydrogenase (G6PD)                                   | 1.77                              | gi 108773793     | 24                  | Cytoplasm    |
| <b>Mitochondrial Metabolism</b>                                            |                                   |                  |                     |              |
| pyruvate carboxylase (PC)                                                  | 1.48                              | gi 106049292     | 8                   | <b>Mito</b>  |
| Aconitase 2, mitochondrial (ACO2)                                          | 1.37                              | gi 20072188      | 11                  | <b>Mito</b>  |
| <b>Anti-Apoptotic/ Anti-Stress &amp; DNA Brake Repairs</b>                 |                                   |                  |                     |              |
| voltage-dependent anion channel 2 (VDAC2)                                  | 1.66                              | gi 48146045      | 29                  | <b>Mito</b>  |
| PRP19/PSO4 pre-mRNA processing factor 19 homolog (PRPF19)                  | 1.51                              | gi 7657381       | 22                  | Nucleus      |
| Inner membrane protein, mitochondrial (mitofilin) (IMMT)                   | 1.5                               | gi 516764        | 6                   | <b>Mito</b>  |
| <b>RNA processing</b>                                                      |                                   |                  |                     |              |
| seryl-tRNA synthetase (SARS)                                               | 2.29                              | gi 119576775     | 21                  | Cytoplasm    |
| heterogeneous nuclear ribonucleoprotein A2/B1 (HNRNPA2B1)                  | 1.41                              | gi 4504447       | 31                  | Nucleus      |
| <b>Keratins</b>                                                            |                                   |                  |                     |              |
| keratin 8 (KRT8)                                                           | 1.71                              | gi 4504919       | 17                  | Cytoplasm    |
| keratin 18 (KRT18)                                                         | 1.55                              | gi 30311         | 18                  | Cytoplasm    |
| <b>Others</b>                                                              |                                   |                  |                     |              |
| latexin, (LXN)                                                             | 1.63                              | gi 119599089     | 32                  | Cytoplasm    |
| proteasome (prosome, macropain) activator subunit 2<br>(PA28 beta) (PSME2) | 1.63                              | gi 30410792      | 32                  | Proteasome   |
